# Supplementary material
Source: Springer Nature journal article supplement (https://www.springermedizin.de/resource/supplementary/12891_2010_1087_MOESM8_ESM.pdf/9507684)

DAPI

TUNEL

Merged

DMSO

Uncompressed

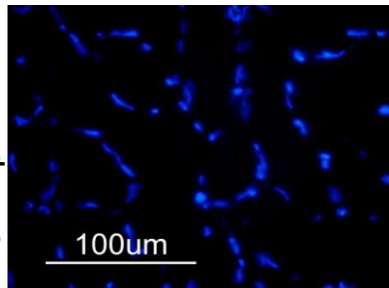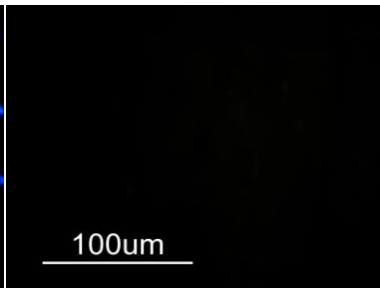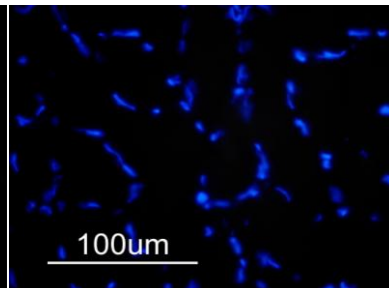

Compressed

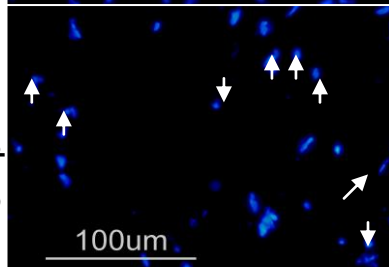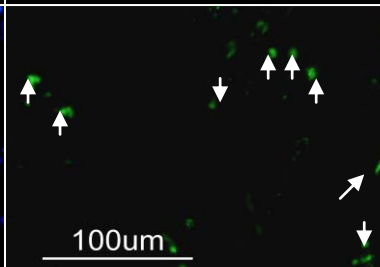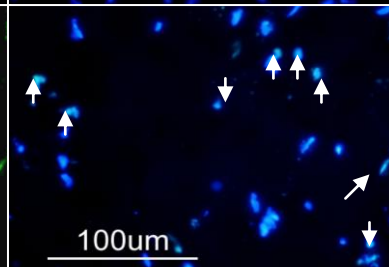

MG132

Uncompressed

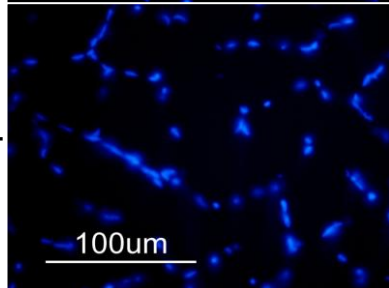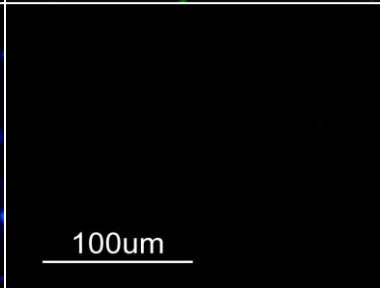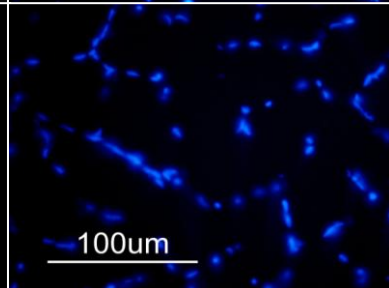

Compressed

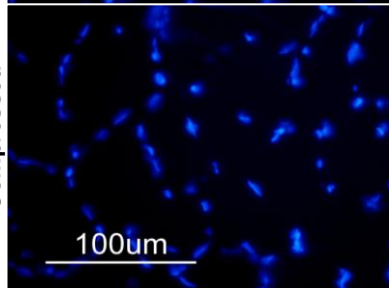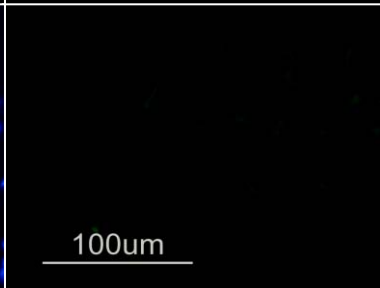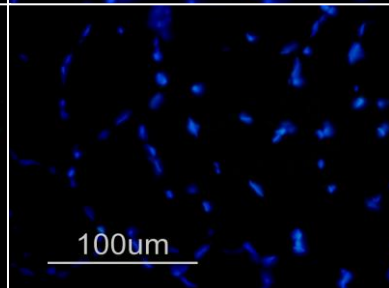

Supplement: MOESM8 [file 9507684]
